# Supplementary material for: Computational identification of tissue-specific alternative splicing elements in mouse genes from RNA-Seq
Source: PubMed Central journal article supplement — Nucleic Acids Res. 2010 Aug 4;38(22):7895–907. doi: 10.1093/nar/gkq679 (PMC3001057; doi:10.1093/nar/gkq679), 2010-08-04
Supplement: supp_gkq679_supplement.pdf [file supp_gkq679_supplement.pdf]

(a)

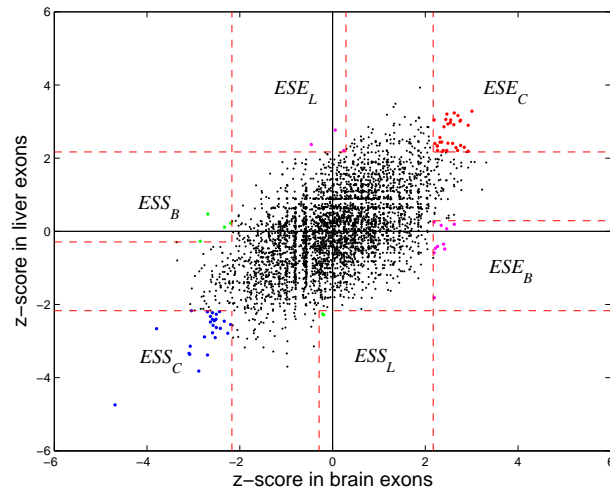

(b)

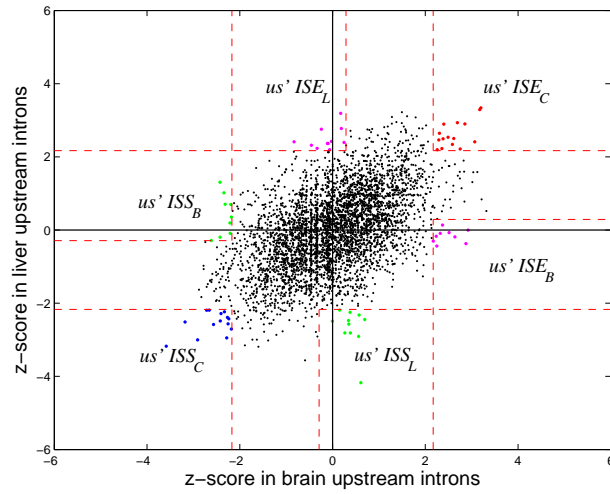

(c)

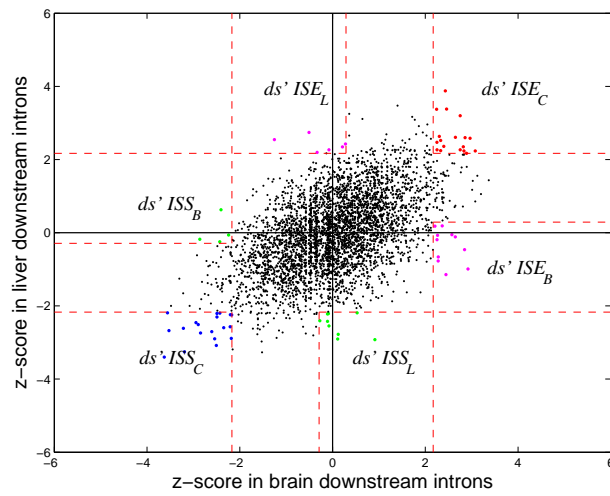

**Supplementary Figure 1.** z-scores for all hexamers in brain and liver. (a) z-scores in exons.  $ESE_C$ ,  $ESE_B$  and  $ESE_L$  stand for common ESE, brain-specific ESE and liver-specific ESE, respectively. (b) z-scores in 400 nt intronic sequences upstream of the exons. (c) z-scores in 400 nt intronic sequences downstream of the exons.

(a)

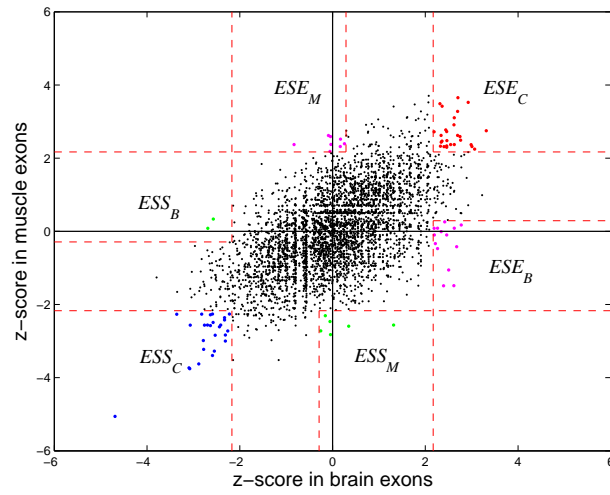

(b)

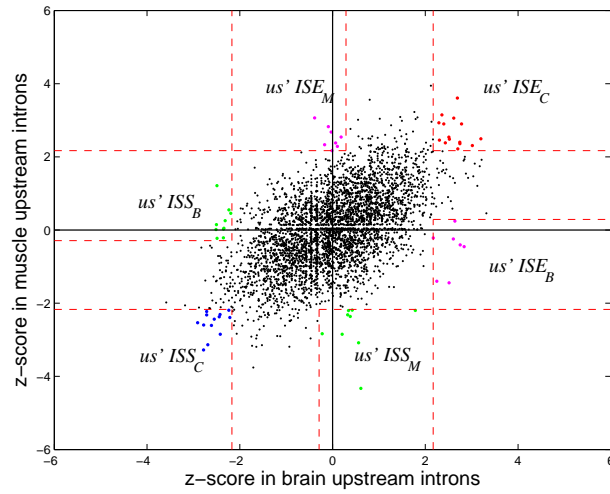

(c)

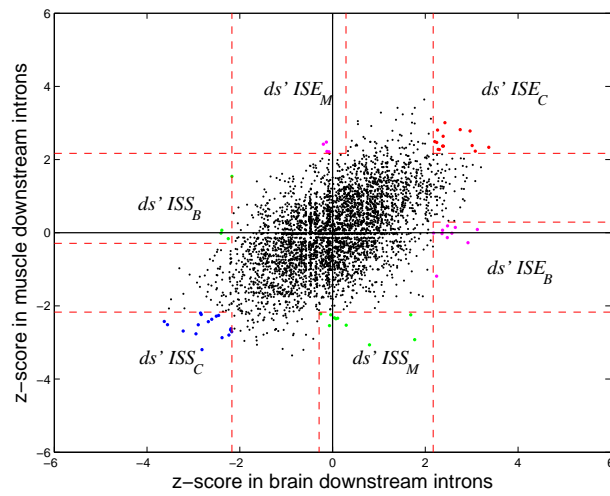

**Supplementary Figure 2.** z-scores for all hexamers in brain and muscle. (a) z-scores in exons.  $ESE_C$ ,  $ESE_B$  and  $ESE_M$  stand for common ESE, brain-specific ESE and muscle-specific ESE, respectively. (b) z-scores in 400 nt intronic sequences upstream of the exons. (c) z-scores in 400 nt intronic sequences downstream of the exons.

**Supplementary Table 1:** List of 456 common and tissue-specific SREs and comparison with existing results. Columns 2 to 6 specify the type of the SREs. Column 7 indicates whether an SRE is also a RESCUE-ESE. Last column contains the information of an SRE in SpliceAid database, which includes the binding factors, PMID reference and the number of the sequences (in parentheses) that our SRE can match to. If more than two records can be found in SpliceAid, only first two are kept..

| Motif  | ESE | ESS | 5' ISE | 5' ISS | 3' ISE | 3' ISS | RescueESE | Selected SpliceAid                           |
|--------|-----|-----|--------|--------|--------|--------|-----------|----------------------------------------------|
| AACUGC | BL? | .   | .      | .      | .      | .      | -         |                                              |
| AAGAAG | BLM | .   | .      | .      | .      | .      | AAGAAG    | HTra2alpha,9546399(2);HTra2beta1,9546399(2); |
| AAGCAG | BLM | .   | .      | .      | .      | .      | AAGCAG    | SC35,10094314(2);                            |
| AUCUAU | BL? | .   | .      | .      | BL-    | .      | -         |                                              |
| ACUUCG | BL? | .   | .      | .      | .      | .      | -         | 9G8,10094314(1);SRp20,10094314(1);           |
| ACGGCA | BLM | .   | .      | .      | .      | .      | -         |                                              |
| AGAAGC | BLM | .   | .      | .      | .      | .      | AGAAGC    | SC35,7543047(1);                             |
| AGCAGC | BL? | .   | .      | .      | .      | .      | AGCAGC    | FMRP,15805463(1);                            |
| AGCUGC | BLM | .   | .      | .      | .      | .      | -         |                                              |
| AGGAAC | BLM | .   | .      | .      | .      | .      | AGGAAC    | SF2/ASF,7543047(2);FMRP,15805463(1);         |
| UAUGAC | BLM | .   | .      | .      | .      | .      | -         |                                              |
| UCGACU | BL? | .   | .      | .      | .      | .      | -         | SRp20,10094314(4);                           |
| UGUUAG | BLM | .   | .      | .      | .      | .      | -         |                                              |
| UGGAGC | BLM | .   | .      | .      | .      | .      | -         |                                              |
| UGGUGU | BL? | .   | .      | .      | .      | .      | -         |                                              |
| UGGGCA | BL? | .   | .      | .      | .      | .      | -         |                                              |
| CACGGC | BLM | .   | .      | .      | .      | .      | -         |                                              |
| CAGCAA | BL? | .   | .      | .      | .      | .      | -         |                                              |
| CUCAUA | BL? | .   | .      | .      | .      | .      | -         |                                              |
| CUGGUG | BL? | .   | .      | .      | .      | .      | -         | FMRP,15805463(1);                            |
| CGACUG | BL? | .   | .      | .      | -L-    | .      | -         | FMRP,15805463(4);                            |
| CGGCAC | BLM | .   | .      | .      | .      | .      | -         | SF2/ASF,16825284(1);                         |
| CGGCCA | BL? | .   | .      | .      | .      | .      | -         |                                              |
| GACUAU | BLM | .   | .      | .      | .      | .      | -         |                                              |
| GUGAUA | BLM | .   | .      | .      | .      | .      | -         |                                              |
| GUGGCU | BLM | .   | .      | .      | .      | .      | -         | FMRP,15805463(1);                            |
| GCAGAA | BL? | .   | .      | .      | .      | .      | GCAGAA    |                                              |
| GCCAAC | BL? | .   | .      | .      | .      | .      | -         |                                              |
| GGAUUU | BL? | .   | .      | .      | .      | .      | -         |                                              |
| GGAUGA | BL? | .   | .      | .      | .      | .      | GGATGA    | SF2/ASF,7543047(1);                          |
| GGAGCA | BLM | .   | .      | .      | .      | .      | -         | SRp40,9037021(4);                            |
| GGUCAG | BL? | .   | .      | .      | .      | .      | -         | SC35,10629063(1);                            |
| AUGAGC | B-- | .   | .      | .      | .      | .      | -         |                                              |
| ACGCGC | B-- | .   | .      | .      | .      | .      | -         | SF2/ASF,7543047(4);                          |
| AGCCUG | B-- | .   | .      | .      | .      | .      | -         |                                              |
| UCUUGC | B-? | .   | .      | .      | UCUUGC | .      | -         |                                              |
| CUGAAA | B-- | .   | .      | .      | .      | .      | CTGAAA    |                                              |
| CGCUGC | B-- | .   | .      | .      | .      | .      | -         | SC35,10629063(1);                            |
| GCAUUC | B-- | .   | .      | .      | .      | .      | -         |                                              |
| GCGCGC | B-- | .   | .      | .      | .      | --M    | -         | SF2/ASF,7543047(1);                          |
| GGGGAC | B-? | .   | .      | .      | .      | .      | -         |                                              |
| GGGGCC | B-- | .   | .      | B?M    | .      | .      | -         |                                              |
| AAAUCA | -L? | .   | .      | .      | .      | .      | -         |                                              |
| AUGUAC | -L? | .   | .      | .      | .      | .      | -         |                                              |
| UCAGGC | -L? | .   | .      | .      | .      | .      | -         |                                              |
| AGGGUG | B?M | .   | .      | .      | .      | .      | -         |                                              |
| UUUUGG | B?M | .   | .      | .      | .      | .      | -         |                                              |
| UUCGAG | B?M | .   | .      | .      | .      | .      | -         | SC35,7543047(3);SC35,10094314(3);et al.      |
| CAAUGA | B?M | .   | .      | .      | .      | .      | -         |                                              |
| CAACCA | B?M | .   | .      | .      | .      | .      | -         |                                              |
| CUUCGA | B?M | .   | .      | .      | .      | .      | -         | 9G8,10094314(1);SRp20,10094314(2);           |
| CCUGCG | B?M | .   | .      | .      | .      | .      | -         | SC35,10629063(1);                            |
| CGGAGA | B?M | .   | .      | .      | .      | .      | CGGAGA    | SC35,7543047(2);                             |
| GCUAAU | B?M | .   | .      | .      | .      | .      | -         |                                              |
| GGAGCG | B?M | .   | .      | .      | .      | .      | -         | SC35,7543047(1);SF2/ASF,16825284(1);         |
| GGUACC | B?M | .   | .      | .      | .      | .      | -         |                                              |
| GGUGGA | B?M | .   | .      | .      | .      | .      | -         |                                              |
| AUCCCG | B?- | .   | .      | .      | .      | .      | -         | SC35,10094314(1);                            |
| UACCUC | B?- | .   | .      | .      | .      | ?L-    | -         |                                              |
| CAGCGC | B?- | .   | .      | .      | .      | .      | -         |                                              |
| CCCUUA | B?- | .   | .      | .      | .      | .      | -         |                                              |

|        |     |     |     |   |   |   |        |                                            |
|--------|-----|-----|-----|---|---|---|--------|--------------------------------------------|
| CCGACG | B?- | .   | .   | . | . | . | -      | 9G8,10094314(1);SF2/ASF,16825284(1);       |
| GAUGAG | B?- | .   | .   | . | . | . | GATGAG |                                            |
| AUGGCU | -?M | .   | .   | . | . | . | -      |                                            |
| AGAGCG | -?M | .   | .   | . | . | . | -      |                                            |
| UGGAGA | -?M | .   | .   | . | . | . | TGGAGA | SC35,10094314(1);                          |
| CAGGCA | -?M | .   | .   | . | . | . | -      |                                            |
| CGGGCU | -?M | .   | .   | . | . | . | -      |                                            |
| GCAACA | -?M | .   | .   | . | . | . | GCAACA |                                            |
| GGAAGG | --M | .   | .   | . | . | . | -      |                                            |
| GGCGGG | --M | .   | .   | . | . | . | -      |                                            |
| AACGAG | ?LM | .   | .   | . | . | . | -      | SC35,10094314(1);                          |
| AAGGAG | ?LM | .   | .   | . | . | . | AAGGAG | SRp40,9037021(1);FMRP,15805463(3);         |
| AUAUGC | ?LM | .   | .   | . | . | . | -      |                                            |
| AGAAGA | ?LM | .   | .   | . | . | . | AGAAGA | SF2/ASF,7543047(2);SRp40,9037021(1);et al. |
| AGCAGA | ?LM | .   | .   | . | . | . | AGCAGA | SC35,7543047(4);                           |
| AGCGAG | ?LM | .   | .   | . | . | . | -      |                                            |
| UCGAUA | ?LM | .   | .   | . | . | . | -      | SRp20,10094314(1);                         |
| UCGGGC | ?LM | .   | .   | . | . | . | -      | SF2/ASF,7543047(1);                        |
| UGUGGC | ?LM | .   | .   | . | . | . | -      |                                            |
| UGCAAC | ?LM | .   | .   | . | . | . | -      |                                            |
| CAACGA | ?LM | .   | .   | . | . | . | -      | 9G8,10094314(2);SRp20,10094314(3);         |
| CAGACU | ?LM | .   | .   | . | . | . | -      |                                            |
| CUCGGU | ?LM | .   | .   | . | . | . | -      |                                            |
| CCAAUG | ?LM | .   | .   | . | . | . | -      | SF2/ASF,16825284(1);                       |
| CGAUAU | ?LM | .   | .   | . | . | . | -      |                                            |
| CGAGUA | ?LM | .   | .   | . | . | . | -      | SC35,7543047(3);SC35,10094314(2);          |
| GAUGGC | ?LM | .   | .   | . | . | . | -      |                                            |
| GAGCUG | ?LM | .   | .   | . | . | . | -      | SRp40,9037021(1);SC35,10094314(1);         |
| GAGCGA | ?LM | .   | .   | . | . | . | -      | FMRP,15805463(3);                          |
| GCAGAU | ?LM | .   | .   | . | . | . | GCAGAT |                                            |
| GGAGAU | ?LM | .   | .   | . | . | . | GGAGAT | SC35,7543047(1);SC35,10094314(2);          |
| AAACUG | ?L- | .   | .   | . | . | . | AAACTG |                                            |
| ACCGCC | ?L- | .   | .   | . | . | . | -      |                                            |
| ACGUUC | ?L- | .   | .   | . | . | . | ACGTTC |                                            |
| UAUAGG | ?L- | .   | .   | . | . | . | -      |                                            |
| UUGGGA | ?L- | .   | .   | . | . | . | -      |                                            |
| CUCAAU | ?L- | .   | .   | . | . | . | -      |                                            |
| CCGCAA | ?L- | .   | .   | . | . | . | -      |                                            |
| CGCUCC | ?L- | .   | .   | . | . | . | -      |                                            |
| GUGUCU | ?L- | .   | .   | . | . | . | -      |                                            |
| GGCGUA | ?L- | .   | .   | . | . | . | -      |                                            |
| CACGUG | ?-M | .   | .   | . | . | . | -      |                                            |
| GAUGCC | ?-M | .   | .   | . | . | . | -      |                                            |
| GAGCGG | ?-M | .   | .   | . | . | . | -      | FMRP,15805463(1);SF2/ASF,16825284(1);      |
| GAGGAG | ?-M | .   | .   | . | . | . | GAGGAG | Added,10022858(1);                         |
| GCUGCG | ?-M | .   | .   | . | . | . | -      |                                            |
| GGGCUG | ?-M | .   | .   | . | . | . | -      | FMRP,15805463(3);                          |
| AAAUAA | .   | BLM | .   | . | . | . | -      |                                            |
| AAUUAA | .   | BLM | .   | . | . | . | -      |                                            |
| ACAAUA | .   | BL? | .   | . | . | . | -      |                                            |
| ACUCAC | .   | BL? | .   | . | . | . | -      |                                            |
| ACCGUC | .   | BLM | .   | . | . | . | -      | SRp55,9649504(1);                          |
| AGAUUA | .   | BL? | BL? | . | . | . | -      |                                            |
| AGGGGA | .   | BL? | .   | . | . | . | -      |                                            |
| UAAGAU | .   | BLM | .   | . | . | . | -      |                                            |
| UAGGCU | .   | BL? | .   | . | . | . | -      | hnRNP A1,7510636(1);SC35,10094314(1);      |
| UUAAAG | .   | BLM | .   | . | . | . | -      |                                            |
| UUUAAA | .   | BLM | .   | . | . | . | -      |                                            |
| UUUUAA | .   | BL? | .   | . | . | . | -      |                                            |
| UUUGAA | .   | BL? | .   | . | . | . | -      |                                            |
| UUCUUU | .   | BL? | .   | . | . | . | -      |                                            |
| UUGAAA | .   | BL? | .   | . | . | . | -      |                                            |
| UCUUAG | .   | BLM | .   | . | . | . | -      |                                            |
| UGUAGC | .   | BL? | .   | . | . | . | -      |                                            |
| UGCUUA | .   | BL? | .   | . | . | . | -      |                                            |
| UGCCUG | .   | BLM | .   | . | . | . | -      |                                            |
| CUGCCU | .   | BLM | .   | . | . | . | -      |                                            |
| CCAUGU | .   | BL? | .   | . | . | . | -      |                                            |
| CCUGCC | .   | BLM | .   | . | . | . | -      |                                            |
| GAACUC | .   | BL? | .   | . | . | . | -      |                                            |
| GUAUAA | .   | BL? | .   | . | . | . | -      |                                            |

|        |   |     |     |     |   |     |   |   |                                                  |
|--------|---|-----|-----|-----|---|-----|---|---|--------------------------------------------------|
| GUGUUU | . | BL? | .   | .   | . | .   | . | - |                                                  |
| GCCUGC | . | BLM | .   | .   | . | .   | . | - |                                                  |
| AAUGUU | . | B-? | .   | .   | . | .   | . | - |                                                  |
| AUAAUA | . | B-M | .   | .   | . | .   | . | - |                                                  |
| AUGAAU | . | B-- | .   | .   | . | .   | . | - | SC35,10094314(1);                                |
| AGAGUG | . | B-? | .   | .   | . | .   | . | - | SC35,7543047(1);                                 |
| ACAUCC | . | -L? | .   | .   | . | .   | . | - |                                                  |
| ACCUUU | . | -L? | .   | .   | . | .   | . | - |                                                  |
| AAUAAU | . | B?M | .   | .   | . | .   | . | - |                                                  |
| AACACU | . | B?M | .   | .   | . | .   | . | - |                                                  |
| AUAAGA | . | B?M | .   | .   | . | .   | . | - |                                                  |
| AUAUUG | . | B?M | .   | .   | . | .   | . | - |                                                  |
| UAAUAA | . | B?M | ?-M | .   | . | .   | . | - | ZRANB2,19304800(1);                              |
| UAUUUA | . | B?M | .   | .   | . | .   | . | - |                                                  |
| UUGUUU | . | B?M | .   | .   | . | .   | . | - |                                                  |
| CAUUUG | . | B?M | .   | .   | . | .   | . | - |                                                  |
| CUUAAG | . | B?M | .   | .   | . | .   | . | - |                                                  |
| CCCAUU | . | B?M | .   | .   | . | .   | . | - |                                                  |
| CGCUGA | . | B?M | .   | .   | . | .   | . | - |                                                  |
| GAUAAA | . | B?M | .   | .   | . | .   | . | - |                                                  |
| GACUCA | . | B?M | .   | .   | . | .   | . | - | SC35,10629063(1);                                |
| GGGUCU | . | B?M | .   | ?-M | . | .   | . | - |                                                  |
| GUUCUG | . | B?- | .   | .   | . | .   | . | - | SC35,10629063(1);                                |
| AAUUC  | . | --M | .   | .   | . | .   | . | - |                                                  |
| AAGCCU | . | -?M | .   | .   | . | .   | . | - |                                                  |
| UCCUUG | . | --M | .   | .   | . | .   | . | - |                                                  |
| CCCUGC | . | -?M | .   | .   | . | .   | . | - |                                                  |
| CCGCC  | . | -?M | .   | .   | . | .   | . | - |                                                  |
| CCGCGC | . | -?M | .   | .   | . | .   | . | - | SF2/ASF,7543047(1);                              |
| AUACAA | . | ?LM | .   | .   | . | .   | . | - |                                                  |
| ACCUCU | . | ?LM | .   | .   | . | .   | . | - |                                                  |
| UAACUU | . | ?LM | .   | .   | . | .   | . | - |                                                  |
| UUAUAA | . | ?LM | .   | .   | . | .   | . | - |                                                  |
| CACUCU | . | ?LM | .   | .   | . | .   | . | - |                                                  |
| CAGACC | . | ?LM | .   | .   | . | .   | . | - |                                                  |
| CUCUGU | . | ?LM | .   | .   | . | ?LM | . | - |                                                  |
| CCUCCC | . | ?LM | .   | .   | . | .   | . | - |                                                  |
| GUAAAG | . | ?LM | .   | .   | . | .   | . | - | ZRANB2,19304800(2);                              |
| GGUCUU | . | ?LM | .   | .   | . | .   | . | - |                                                  |
| AUUCUU | . | ?L- | .   | .   | . | .   | . | - |                                                  |
| CCCCAG | . | ?L- | .   | .   | . | .   | . | - |                                                  |
| CGGCAG | . | ?L- | .   | .   | . | .   | . | - | SF2/ASF,16825284(1);                             |
| CCGCUC | . | ?-M | .   | .   | . | .   | . | - |                                                  |
| GGGUUG | . | ?-M | .   | .   | . | .   | . | - |                                                  |
| UAACGU | . | .   | BLM | .   | . | .   | . | - |                                                  |
| UAUGCA | . | .   | BL? | .   | . | .   | . | - |                                                  |
| UUGUAC | . | .   | BLM | .   | . | .   | . | - |                                                  |
| UGAUUG | . | .   | BL? | .   | . | .   | . | - |                                                  |
| UGUGCG | . | .   | BL? | .   | . | .   | . | - |                                                  |
| CACAU  | . | .   | BL- | .   | . | .   | . | - |                                                  |
| CUAAAG | . | .   | BLM | .   | . | .   | . | - |                                                  |
| CUUGGG | . | .   | BLM | .   | . | .   | . | - |                                                  |
| CCUAAA | . | .   | BLM | .   | . | .   | . | - |                                                  |
| CGACAG | . | .   | BL? | .   | . | .   | . | - | SF2/ASF,16825284(1);                             |
| GAGAUU | . | .   | BL? | .   | . | .   | . | - | GAGATT SRp20,10094314(1);                        |
| GUGUGC | . | .   | BL? | .   | . | .   | . | - |                                                  |
| GCAGCA | . | .   | BLM | .   | . | .   | . | - |                                                  |
| GGAGUC | . | .   | BL? | .   | . | .   | . | - |                                                  |
| AACUCA | . | .   | B-- | .   | . | .   | . | - |                                                  |
| AUAUGU | . | .   | B-- | .   | . | .   | . | - |                                                  |
| UAGUCG | . | .   | B-? | .   | . | .   | . | - |                                                  |
| UUGGUG | . | .   | B-? | .   | . | .   | . | - |                                                  |
| UCCUGA | . | .   | B-? | .   | . | .   | . | - |                                                  |
| CAUGCA | . | .   | B-- | .   | . | .   | . | - | Nova-1,9154818(1);                               |
| CUGGGC | . | .   | B-? | .   | . | .   | . | - | FMRP,15805463(2);                                |
| CCUACU | . | .   | B-- | .   | . | .   | . | - |                                                  |
| GGUGCC | . | .   | B-? | .   | . | .   | . | - |                                                  |
| ACACUG | . | .   | -L? | .   | . | .   | . | - |                                                  |
| ACUUGA | . | .   | -L? | .   | . | .   | . | - |                                                  |
| AGGAGA | . | .   | -L? | .   | . | .   | . | - | AGGAGA SC35,7543047(4);SF2/ASF,7543047(1);et al. |
| UACACU | . | .   | -L- | .   | . | .   | . | - |                                                  |

|         |   |   |     |     |     |     |   |                                             |
|---------|---|---|-----|-----|-----|-----|---|---------------------------------------------|
| UUGUAG  | . | . | -L? | .   | B?M | .   | - |                                             |
| CUAUAA  | . | . | -L? | .   | .   | .   | - |                                             |
| CCGAAC  | . | . | -L? | .   | .   | .   | - |                                             |
| CGCAUG  | . | . | -L? | .   | .   | .   | - |                                             |
| GAUGGU  | . | . | -L? | .   | .   | .   | - |                                             |
| GACACA  | . | . | -L? | .   | .   | .   | - |                                             |
| GCACGC  | . | . | -L? | .   | .   | .   | - |                                             |
| AAGUGA  | . | . | B?M | .   | .   | .   | - |                                             |
| ACUUAG  | . | . | B?M | .   | .   | .   | - |                                             |
| AGCUUA  | . | . | B?M | .   | .   | .   | - |                                             |
| UUCAUG  | . | . | B?M | .   | .   | .   | - |                                             |
| UCCUGC  | . | . | B?M | .   | .   | .   | - | SC35,10094314(1);                           |
| CACUUA  | . | . | B?M | .   | .   | .   | - |                                             |
| CAGGGG  | . | . | B?M | .   | .   | .   | - |                                             |
| GUGAUU  | . | . | B?M | .   | .   | .   | - |                                             |
| GCUCCC  | . | . | B?M | .   | .   | .   | - | SC35,10629063(1);                           |
| AUGUGU  | . | . | B?- | .   | .   | .   | - | ETR-3,15657417(1);                          |
| UGAGAU  | . | . | B?- | .   | .   | .   | - |                                             |
| AUAAAU  | . | . | -?M | .   | .   | .   | - |                                             |
| ACCGGA  | . | . | -?M | .   | .   | .   | - |                                             |
| AGCAAG  | . | . | -?M | .   | .   | .   | - | AGCAAG                                      |
| AGCUGA  | . | . | -?M | .   | .   | .   | - | AGCTGA SRp40,9037021(1);                    |
| AGGCCG  | . | . | -?M | .   | .   | .   | - |                                             |
| UAAUUA  | . | . | -?M | .   | .   | .   | - |                                             |
| UCCCCU  | . | . | --M | .   | .   | .   | - | SC35,10629063(1);                           |
| GCUGAC  | . | . | --M | .   | .   | .   | - |                                             |
| AGACAC  | . | . | ?LM | .   | .   | .   | - |                                             |
| UAUAAA  | . | . | ?LM | .   | .   | .   | - |                                             |
| UCAGCU  | . | . | ?LM | .   | .   | .   | - |                                             |
| UGAUUU  | . | . | ?LM | .   | .   | .   | - |                                             |
| UGUCAC  | . | . | ?LM | .   | .   | .   | - |                                             |
| UGCGUG  | . | . | ?LM | .   | .   | .   | - | SRp55,9649504(1);                           |
| CACUUG  | . | . | ?LM | .   | .   | .   | - |                                             |
| CUUGAA  | . | . | ?LM | .   | .   | .   | - |                                             |
| CCAGAG  | . | . | ?LM | .   | .   | .   | - |                                             |
| GUGCGU  | . | . | ?LM | .   | .   | .   | - |                                             |
| AAGUUU  | . | . | ?L- | .   | .   | BL? | - |                                             |
| CAA AUG | . | . | ?L- | .   | .   | .   | - |                                             |
| CAGCCA  | . | . | ?-M | .   | .   | .   | - |                                             |
| GCAGCC  | . | . | ?-M | .   | .   | .   | - |                                             |
| GGCAGC  | . | . | ?-M | .   | ?LM | .   | - |                                             |
| AAGAUU  | . | . | .   | BLM | .   | .   | - | AAGATT                                      |
| UUAUCA  | . | . | .   | BL? | .   | .   | - |                                             |
| UUACAA  | . | . | .   | BL? | .   | .   | - |                                             |
| UCCAAU  | . | . | .   | BL? | .   | .   | - |                                             |
| CAUUUU  | . | . | .   | BL? | .   | .   | - | Nova-1,9154818(1);                          |
| CUAGAA  | . | . | .   | BLM | .   | .   | - | SC35,10629063(1);                           |
| CUUUCU  | . | . | .   | BL? | .   | .   | - |                                             |
| CUGCAA  | . | . | .   | BL? | .   | .   | - | CTGCAA                                      |
| CUGGAA  | . | . | .   | BL? | .   | .   | - | CTGGAA                                      |
| CCCACC  | . | . | .   | BL? | .   | .   | - |                                             |
| CCCUUC  | . | . | .   | BL? | .   | .   | - |                                             |
| CCCCGC  | . | . | .   | BL? | .   | -LM | - | SF2/ASF,16825284(1);                        |
| GCCGAU  | . | . | .   | BLM | .   | .   | - |                                             |
| GGGAAA  | . | . | .   | BL? | .   | .   | - |                                             |
| AACCAG  | . | . | .   | B-? | .   | .   | - | SC35,10094314(2);                           |
| AACCGU  | . | . | .   | B-? | .   | .   | - | AACCGT                                      |
| ACUAUU  | . | . | .   | B-? | .   | --M | - |                                             |
| CAAAAA  | . | . | .   | B-- | .   | .   | - |                                             |
| CAUCCG  | . | . | .   | B-M | .   | .   | - |                                             |
| CAGUCA  | . | . | .   | B-? | .   | .   | - |                                             |
| CUUACA  | . | . | .   | B-? | .   | .   | - |                                             |
| GUAUCG  | . | . | .   | B-- | .   | .   | - |                                             |
| GUCAGU  | . | . | .   | B-? | .   | .   | - | SC35,10629063(1);                           |
| AUUCAU  | . | . | .   | -L- | .   | .   | - | Nova-1,9154818(5);SRp20,10094314(1);        |
| AUCCCU  | . | . | .   | -L? | .   | .   | - |                                             |
| UAAGGC  | . | . | .   | -L? | .   | .   | - |                                             |
| UCUCUC  | . | . | .   | -LM | .   | .   | - |                                             |
| UGUAUG  | . | . | .   | -L? | .   | .   | - |                                             |
| CUUCUU  | . | . | .   | -L? | .   | BL? | - | hnRNP I (PTB),9214659(1);SRp20,10094314(1); |
| CUCUCU  | . | . | .   | -LM | .   | .   | - |                                             |

|        |   |   |   |     |     |   |        |                                         |
|--------|---|---|---|-----|-----|---|--------|-----------------------------------------|
| CCCCCA | . | . | . | -L? | .   | . | -      |                                         |
| GAGAAG | . | . | . | -L? | .   | . | GAGAAG | SRp40,9037021(1);                       |
| GCAUGC | . | . | . | -L? | .   | . | -      |                                         |
| GGAUAC | . | . | . | -L? | .   | . | -      |                                         |
| AUAUGA | . | . | . | B?M | .   | . | -      |                                         |
| AUUUAG | . | . | . | B?M | .   | . | -      |                                         |
| UCCUCA | . | . | . | B?M | .   | . | -      | SC35,10629063(1);                       |
| UGAGAA | . | . | . | B?M | .   | . | TGAGAA | SRp40,9037021(1);                       |
| UGCCGA | . | . | . | B?M | .   | . | -      |                                         |
| CAGUCC | . | . | . | B?M | .   | . | -      | SC35,10094314(1);                       |
| CAGGAC | . | . | . | B?M | .   | . | -      |                                         |
| GGGGCG | . | . | . | B?M | .   | . | -      |                                         |
| AUCGUU | . | . | . | B?- | .   | . | -      | SRp20,10094314(2);                      |
| ACAGGC | . | . | . | B?- | .   | . | -      |                                         |
| CAAGGA | . | . | . | B?- | .   | . | -      | SF2/ASF,7543047(1);SRp40,9037021(1);    |
| CAUCAC | . | . | . | B?- | .   | . | -      | Nova-1,9154818(1);SRp20,10094314(2);    |
| CAGCGG | . | . | . | B?- | .   | . | -      | SF2/ASF,9649504(2);                     |
| CAGGCU | . | . | . | B?- | .   | . | -      |                                         |
| GUUCCG | . | . | . | B?- | .   | . | -      | SC35,10094314(1);                       |
| GGUAGC | . | . | . | B?- | .   | . | -      | ZRANB2,19304800(1);                     |
| AAUUGC | . | . | . | -?M | .   | . | -      |                                         |
| AUAUAC | . | . | . | --M | .   | . | -      |                                         |
| AUGCAG | . | . | . | -?M | .   | . | -      |                                         |
| ACACAC | . | . | . | --M | .   | . | -      | added,15889141(1);                      |
| UAUGUG | . | . | . | -?M | .   | . | -      | ETR-3,15657417(1);                      |
| CUAAUU | . | . | . | -?M | .   | . | -      |                                         |
| GUAUAU | . | . | . | -?M | .   | . | -      |                                         |
| UCUAAU | . | . | . | ?LM | .   | . | -      |                                         |
| UCUCUU | . | . | . | ?LM | .   | . | -      |                                         |
| UCUGCA | . | . | . | ?LM | .   | . | -      |                                         |
| UCUGCG | . | . | . | ?LM | .   | . | -      |                                         |
| CAAUAC | . | . | . | ?LM | .   | . | -      |                                         |
| CUAUAU | . | . | . | ?LM | .   | . | -      |                                         |
| CUUCCU | . | . | . | ?LM | B-? | . | -      |                                         |
| CUCUUU | . | . | . | ?LM | .   | . | -      |                                         |
| CUCCCG | . | . | . | ?LM | .   | . | -      |                                         |
| CCUAUG | . | . | . | ?LM | .   | . | -      |                                         |
| GUUAUC | . | . | . | ?LM | .   | . | -      |                                         |
| GUGUAU | . | . | . | ?LM | .   | . | -      |                                         |
| GGAAAC | . | . | . | ?LM | .   | . | GGAAAC |                                         |
| CUGCGG | . | . | . | ?L- | .   | . | -      |                                         |
| CCGACC | . | . | . | ?L- | B-? | . | -      | SF2/ASF,16825284(1);                    |
| CGACCC | . | . | . | ?L- | .   | . | -      |                                         |
| GGCUUU | . | . | . | ?L- | .   | . | -      |                                         |
| CAUCAA | . | . | . | ?-M | .   | . | CATCAA | SRp20,10094314(1);                      |
| AAUCAU | . | . | . | .   | BL? | . | -      | Nova-1,9154818(1);                      |
| AUUGAU | . | . | . | .   | BL? | . | -      | 9G8,10094314(1);                        |
| AUGGAG | . | . | . | .   | BLM | . | ATGGAG | SC35,7543047(1);SC35,10629063(1);et al. |
| UUACUG | . | . | . | .   | BLM | . | -      |                                         |
| UUGAUU | . | . | . | .   | BL? | . | -      |                                         |
| UUGCUU | . | . | . | .   | BLM | . | -      |                                         |
| UGAGGG | . | . | . | .   | BL? | . | -      |                                         |
| CAUUAC | . | . | . | .   | BL? | . | -      |                                         |
| CUUGCC | . | . | . | .   | BL? | . | -      |                                         |
| CUGCGU | . | . | . | .   | BL? | . | -      |                                         |
| CCGAAG | . | . | . | .   | BL? | . | -      |                                         |
| GAACCG | . | . | . | .   | BLM | . | -      |                                         |
| GAGGGA | . | . | . | .   | BL? | . | -      |                                         |
| GUCGUC | . | . | . | .   | BL? | . | -      |                                         |
| GCCUUU | . | . | . | .   | BL? | . | -      |                                         |
| GGAUGC | . | . | . | .   | BL? | . | -      |                                         |
| GGAGGG | . | . | . | .   | BL? | . | -      | SRp40,9037021(2);                       |
| ACGCC  | . | . | . | .   | B-- | . | -      |                                         |
| UUGAGG | . | . | . | .   | B-? | . | -      |                                         |
| UGCGCC | . | . | . | .   | B-? | . | -      |                                         |
| CACCCU | . | . | . | .   | B-? | . | -      |                                         |
| CACCGU | . | . | . | .   | B-? | . | -      |                                         |
| GAGUUG | . | . | . | .   | B-M | . | -      |                                         |
| GCGCCU | . | . | . | .   | B-- | . | -      |                                         |
| GGAAUG | . | . | . | .   | B-? | . | -      | SF2/ASF,7543047(1);SC35,10094314(2);    |
| GGGAUG | . | . | . | .   | B-- | . | -      |                                         |

|         |   |   |   |   |     |     |        |                                            |
|---------|---|---|---|---|-----|-----|--------|--------------------------------------------|
| AUUACA  | . | . | . | . | -L- | .   | -      |                                            |
| AUGAUC  | . | . | . | . | -L? | .   | -      |                                            |
| UGAACA  | . | . | . | . | -L? | .   | -      | SF2/ASF,16825284(1);                       |
| GCUUAC  | . | . | . | . | -L? | .   | -      |                                            |
| GCGGAU  | . | . | . | . | -L? | .   | -      |                                            |
| AUUACU  | . | . | . | . | B?M | .   | -      |                                            |
| CCAAAC  | . | . | . | . | B?M | .   | -      |                                            |
| CGCUAA  | . | . | . | . | B?M | .   | -      |                                            |
| GUUAAA  | . | . | . | . | B?M | .   | -      |                                            |
| GCGUGC  | . | . | . | . | B?M | .   | -      |                                            |
| GGCAGG  | . | . | . | . | B?M | .   | -      |                                            |
| GGCGGC  | . | . | . | . | B?M | .   | -      |                                            |
| GGGGGA  | . | . | . | . | B?M | .   | -      | Added,10022858(1);                         |
| AGGGGC  | . | . | . | . | B?- | .   | -      |                                            |
| UUCUAU  | . | . | . | . | B?- | .   | -      |                                            |
| CAGUUA  | . | . | . | . | B?- | .   | -      |                                            |
| CUAGUA  | . | . | . | . | B?- | .   | -      | hnRNP DL,12406575(1);                      |
| CGACAU  | . | . | . | . | B?- | .   | -      |                                            |
| GGAACU  | . | . | . | . | B?- | .   | -      |                                            |
| UUUAGU  | . | . | . | . | -?M | .   | -      |                                            |
| UGCAUG  | . | . | . | . | --M | -L- | -      | Fox-1,16537540(1);Fox-2,16537540(1);et al. |
| UGGUUU  | . | . | . | . | -?M | .   | -      |                                            |
| GUCUCG  | . | . | . | . | --M | .   | -      |                                            |
| ACGUUA  | . | . | . | . | ?LM | .   | -      |                                            |
| UUAAAA  | . | . | . | . | ?LM | .   | -      |                                            |
| UGUGGA  | . | . | . | . | ?LM | .   | -      |                                            |
| CGUUUAU | . | . | . | . | ?LM | .   | -      |                                            |
| GUGGAG  | . | . | . | . | ?LM | .   | -      |                                            |
| AACUGG  | . | . | . | . | ?L- | .   | -      | AACTGG                                     |
| UAUCUA  | . | . | . | . | ?L- | .   | -      |                                            |
| UUGCGA  | . | . | . | . | ?L- | .   | -      |                                            |
| UCAUCU  | . | . | . | . | ?L- | .   | -      | Nova-1,9154818(2);SRp20,10094314(1);       |
| UCUAUC  | . | . | . | . | ?L- | --M | -      |                                            |
| CGCGCU  | . | . | . | . | ?L- | .   | -      | SF2/ASF,7543047(1);                        |
| CGGUGC  | . | . | . | . | ?L- | .   | -      |                                            |
| GAUCAG  | . | . | . | . | ?L- | .   | -      |                                            |
| AAUGGU  | . | . | . | . | ?-M | .   | -      |                                            |
| AGGGCU  | . | . | . | . | ?-M | .   | -      |                                            |
| UGACAU  | . | . | . | . | ?-M | .   | -      |                                            |
| CUGACA  | . | . | . | . | ?-M | .   | -      |                                            |
| GCGAAC  | . | . | . | . | ?-M | .   | -      |                                            |
| AAACUU  | . | . | . | . | .   | BL? | -      |                                            |
| AUUUUG  | . | . | . | . | .   | BL? | -      |                                            |
| ACUCGG  | . | . | . | . | .   | BL? | -      |                                            |
| AGUUUC  | . | . | . | . | .   | BL? | -      |                                            |
| UACGUA  | . | . | . | . | .   | BLM | -      |                                            |
| UUCUUC  | . | . | . | . | .   | BLM | -      | SRp20,10094314(2);                         |
| UCAUCA  | . | . | . | . | .   | BLM | TCATCA | Nova-1,9154818(2);SRp20,10094314(3);       |
| UCUAAA  | . | . | . | . | .   | BL? | -      |                                            |
| CACAUG  | . | . | . | . | .   | BL? | -      |                                            |
| CUAAAA  | . | . | . | . | .   | BLM | -      |                                            |
| CUUCUC  | . | . | . | . | .   | BL? | -      |                                            |
| CUGGAG  | . | . | . | . | .   | BLM | -      |                                            |
| CCUUCU  | . | . | . | . | .   | BL? | -      |                                            |
| CGAGAA  | . | . | . | . | .   | BLM | CGAGAA | SC35,7543047(1);SC35,10094314(1);          |
| GAAUAU  | . | . | . | . | .   | BL? | -      |                                            |
| GUUUGG  | . | . | . | . | .   | BL? | -      |                                            |
| GCAUGG  | . | . | . | . | .   | BL? | -      |                                            |
| CACACA  | . | . | . | . | .   | B-? | -      | added,15889141(1);                         |
| GAAGAG  | . | . | . | . | .   | B-? | GAAGAG | SF2/ASF,7543047(1);                        |
| GCACAG  | . | . | . | . | .   | B-? | -      |                                            |
| GGAAGA  | . | . | . | . | .   | B-? | GGAAGA |                                            |
| ACGGCU  | . | . | . | . | .   | -L? | -      |                                            |
| UGAAGG  | . | . | . | . | .   | -L- | TGAAGG | FMRP,15805463(2);                          |
| UGGGGA  | . | . | . | . | .   | -L? | -      |                                            |
| CGCCCC  | . | . | . | . | .   | -L- | -      |                                            |
| GCAUGU  | . | . | . | . | .   | -L- | -      |                                            |
| GCUCGG  | . | . | . | . | .   | -L? | -      |                                            |
| GCCCCG  | . | . | . | . | .   | -L? | -      |                                            |
| AAAAGC  | . | . | . | . | .   | B?M | AAAAGC |                                            |
| AAGCCA  | . | . | . | . | .   | B?M | AAGCCA |                                            |



|         |   |   |   |   |   |     |        |                                         |
|---------|---|---|---|---|---|-----|--------|-----------------------------------------|
| AGAUAA  | . | . | . | . | . | B?M | -      | SC35,7543047(1);                        |
| AGCCAU  | . | . | . | . | . | B?M | -      |                                         |
| UAAAAG  | . | . | . | . | . | B?M | -      | ZRANB2,19304800(1);                     |
| UAGAAC  | . | . | . | . | . | B?M | -      |                                         |
| UCGUUC  | . | . | . | . | . | B?M | -      | SRp20,10094314(2);                      |
| CUACCC  | . | . | . | . | . | B?M | -      |                                         |
| CUUCAAA | . | . | . | . | . | B?M | -      | SRp20,10094314(3);                      |
| CCAUCU  | . | . | . | . | . | B?M | -      |                                         |
| GCAUAA  | . | . | . | . | . | B?M | -      |                                         |
| ACGAUG  | . | . | . | . | . | B?- | -      | 9G8,10094314(1);                        |
| UCCUUA  | . | . | . | . | . | B?- | -      |                                         |
| GUUUCU  | . | . | . | . | . | B?- | -      |                                         |
| GGAUCC  | . | . | . | . | . | B?- | -      | SC35,10629063(1);                       |
| AUCAUC  | . | . | . | . | . | -?M | ATCATC | SRp20,10094314(2);                      |
| AGCAUU  | . | . | . | . | . | -?M | -      |                                         |
| CUAUCU  | . | . | . | . | . | --M | -      |                                         |
| CUAGCC  | . | . | . | . | . | -?M | -      | hnRNP DL,12406575(2);                   |
| CGCGCC  | . | . | . | . | . | -?M | -      | SF2/ASF,7543047(1);SF2/ASF,16825284(1); |
| GAGGCU  | . | . | . | . | . | --M | -      | SRp40,9037021(1);                       |
| AUAAGU  | . | . | . | . | . | ?LM | -      | Nova-1,9154818(1);                      |
| ACUCAA  | . | . | . | . | . | ?LM | ACTCAA | SC35,10629063(1);                       |
| UAGAAG  | . | . | . | . | . | ?LM | -      |                                         |
| UCGGGU  | . | . | . | . | . | ?LM | -      |                                         |
| CAUGGG  | . | . | . | . | . | ?LM | -      |                                         |
| CCGGAU  | . | . | . | . | . | ?LM | -      | SC35,10094314(1);                       |
| GGCCCU  | . | . | . | . | . | ?LM | -      |                                         |
| UAUGGC  | . | . | . | . | . | ?L- | -      |                                         |
| UUCAUU  | . | . | . | . | . | ?L- | -      | Nova-1,9154818(4);                      |
| UGAACG  | . | . | . | . | . | ?L- | -      |                                         |
| CUCUUC  | . | . | . | . | . | ?L- | -      | SRp20,10094314(1);                      |
| CCCCGA  | . | . | . | . | . | ?L- | -      | SF2/ASF,16825284(1);                    |
| GUGCAU  | . | . | . | . | . | ?L- | -      |                                         |
| GCUAUG  | . | . | . | . | . | ?L- | -      | FMRP,15805463(1);                       |
| ACUCUA  | . | . | . | . | . | ?-M | -      |                                         |
| AGCUAG  | . | . | . | . | . | ?-M | -      |                                         |
| AGGUAG  | . | . | . | . | . | ?-M | -      | ZRANB2,19304800(2);                     |
| UAUAUU  | . | . | . | . | . | ?-M | -      |                                         |
| UUUUUU  | . | . | . | . | . | ?-M | -      |                                         |
| UUCCCC  | . | . | . | . | . | ?-M | -      |                                         |
| GCCAUG  | . | . | . | . | . | ?-M | -      | Nova-1,9154818(1);                      |

**Supplementary Table 2:** List of 71 SREs with  $p$ -value  $< 0.01$  in the position bias test. Column 2 and 3 represent the annotation of the SRE. Column 4 gives the total number of occurrence of the SRE in the data analyzed. Column 5 gives the total number of intronic or exonic sequences used in analyses. The last three columns list  $p$ -value, chi-square statistic and degree of freedom, respectively.

| Elements | Anno. | Anno. | No.Occu. | No. Seq. | p-value  | statistic | DF |
|----------|-------|-------|----------|----------|----------|-----------|----|
| CTCTCT   | 5ISS  | -LM   | 301      | 721      | 1.33E-16 | 158.1739  | 38 |
| TCTCTC   | 5ISS  | -LM   | 279      | 721      | 2.59E-14 | 144.3971  | 38 |
| ATGGAG   | 3ISE  | BLM   | 142      | 994      | 1.83E-13 | 139.1915  | 38 |
| AAGATT   | 5ISS  | BLM   | 168      | 1030     | 4.69E-12 | 130.4024  | 38 |
| TTGTAC   | 5ISE  | BLM   | 93       | 964      | 6.85E-11 | 122.9677  | 38 |
| TCTCTT   | 5ISS  | ?LM   | 263      | 721      | 1.58E-10 | 120.6236  | 38 |
| TTCTTC   | 3ISS  | BLM   | 316      | 1044     | 1.61E-09 | 113.9873  | 38 |
| AGATAA   | 3ISS  | B?M   | 101      | 658      | 4.69E-08 | 104.0396  | 38 |
| CTGCCT   | ESS   | BLM   | 43       | 454      | 5.26E-08 | 51.65116  | 9  |
| CCTAAA   | 5ISE  | BLM   | 116      | 964      | 1.20E-07 | 101.1897  | 38 |
| TGATTT   | 5ISE  | ?LM   | 196      | 639      | 1.51E-07 | 100.4796  | 38 |
| TTACTG   | 3ISE  | BLM   | 177      | 994      | 2.83E-07 | 98.55172  | 38 |
| CTTGGG   | 5ISE  | BLM   | 202      | 964      | 5.63E-07 | 96.4      | 38 |
| CTAAAA   | 3ISS  | BLM   | 189      | 1044     | 1.41E-06 | 93.49206  | 38 |
| TTAAAG   | ESS   | BLM   | 33       | 454      | 1.63E-06 | 43.66667  | 9  |
| GTGATT   | 5ISE  | B?M   | 113      | 663      | 2.21E-06 | 92.05556  | 38 |
| TTCATG   | 5ISE  | B?M   | 136      | 663      | 2.41E-06 | 91.77778  | 38 |
| AGGAAC   | ESE   | BLM   | 38       | 483      | 2.63E-06 | 42.52632  | 9  |
| CTCTTT   | 5ISS  | ?LM   | 226      | 721      | 3.50E-06 | 90.57399  | 38 |
| AGTTTC   | 3ISS  | BL?   | 136      | 702      | 4.21E-06 | 89.97059  | 38 |
| TATGCA   | 5ISE  | BL?   | 90       | 626      | 6.83E-06 | 88.38636  | 38 |
| GGGAAA   | 5ISS  | BL?   | 151      | 686      | 1.08E-05 | 86.87417  | 38 |
| TGTCAC   | 5ISE  | ?LM   | 88       | 639      | 1.58E-05 | 85.58621  | 38 |
| AGATAT   | 5ISE  | BL?   | 89       | 626      | 1.97E-05 | 84.84091  | 38 |
| GAGGGA   | 3ISE  | BL?   | 144      | 643      | 2.81E-05 | 83.63636  | 38 |
| GTTTGG   | 3ISS  | BL?   | 134      | 702      | 3.27E-05 | 83.1194   | 38 |
| TTGATT   | 3ISE  | BL?   | 120      | 643      | 4.17E-05 | 82.28814  | 38 |
| CTCTGT   | 3ISE  | ?LM   | 239      | 663      | 4.97E-05 | 81.68103  | 38 |
| TAAAAG   | 3ISS  | B?M   | 135      | 658      | 5.42E-05 | 81.37778  | 38 |
| TCATCA   | 3ISS  | BLM   | 142      | 1044     | 5.43E-05 | 81.36765  | 38 |
| GAATAT   | 3ISS  | BL?   | 107      | 702      | 8.62E-05 | 79.75     | 38 |
| TCCTGC   | 5ISE  | B?M   | 134      | 663      | 1.06E-04 | 79.00752  | 38 |
| CTGGAG   | 3ISS  | BLM   | 245      | 1044     | 1.11E-04 | 78.86885  | 38 |
| AGACAC   | 5ISE  | ?LM   | 90       | 639      | 1.51E-04 | 77.75     | 38 |
| GGGGGA   | 3ISE  | B?M   | 117      | 682      | 1.78E-04 | 77.16814  | 38 |
| GCAGCA   | 5ISE  | BLM   | 163      | 964      | 1.87E-04 | 76.9816   | 38 |
| CACTTA   | 5ISE  | B?M   | 86       | 663      | 2.23E-04 | 76.34884  | 38 |
| GGCCCT   | 3ISS  | ?LM   | 99       | 728      | 2.25E-04 | 76.30612  | 38 |
| TAGAAC   | 3ISS  | B?M   | 96       | 658      | 2.29E-04 | 76.25     | 38 |
| TTGTAG   | 3ISE  | B?M   | 118      | 682      | 2.94E-04 | 75.33333  | 38 |
| TCCTCA   | 5ISS  | B?M   | 135      | 653      | 2.95E-04 | 75.31298  | 38 |
| GGAGGG   | 3ISE  | BL?   | 189      | 643      | 3.28E-04 | 74.92064  | 38 |
| GCAGAA   | ESE   | BL?   | 25       | 320      | 3.47E-04 | 30.6      | 9  |
| CCTTCT   | 3ISS  | BL?   | 163      | 702      | 4.21E-04 | 74        | 38 |
| TGATTG   | 5ISE  | BL?   | 89       | 626      | 5.04E-04 | 73.31818  | 38 |
| CACTTG   | 5ISE  | ?LM   | 109      | 639      | 5.32E-04 | 73.11927  | 38 |
| CTAGAA   | 5ISS  | BLM   | 177      | 1030     | 5.37E-04 | 73.08475  | 38 |
| CTTTCT   | 5ISS  | BL?   | 223      | 686      | 6.37E-04 | 72.43243  | 38 |
| ATTACT   | 3ISE  | B?M   | 100      | 682      | 7.93E-04 | 71.6      | 38 |
| TATAAA   | 5ISE  | ?LM   | 150      | 639      | 8.70E-04 | 71.24324  | 38 |
| TGAGAA   | 5ISS  | B?M   | 151      | 653      | 1.03E-03 | 70.60403  | 38 |
| CATGGG   | 3ISS  | ?LM   | 161      | 728      | 1.10E-03 | 70.3354   | 38 |
| GAGATT   | 5ISE  | BL?   | 89       | 626      | 1.51E-03 | 69.09302  | 38 |
| TAGAAG   | 3ISS  | ?LM   | 100      | 728      | 1.78E-03 | 68.42424  | 38 |
| AAAAGC   | 3ISS  | B?M   | 108      | 658      | 1.88E-03 | 68.22222  | 38 |
| GATGGC   | ESE   | ?LM   | 21       | 306      | 1.94E-03 | 26.14286  | 9  |
| CCCACC   | 5ISS  | BL?   | 123      | 686      | 2.21E-03 | 67.56098  | 38 |
| GTAAAA   | 3ISE  | B?M   | 109      | 682      | 2.30E-03 | 67.3945   | 38 |
| ACTTAG   | 5ISE  | B?M   | 95       | 663      | 2.99E-03 | 66.33684  | 38 |
| AGCCAT   | 3ISS  | B?M   | 102      | 658      | 3.13E-03 | 66.14     | 38 |
| GAAAC    | 5ISS  | ?LM   | 100      | 721      | 3.13E-03 | 66.14     | 38 |
| ACTCAA   | 3ISS  | ?LM   | 85       | 728      | 3.28E-03 | 65.95294  | 38 |

|        |      |     |     |     |          |          |    |
|--------|------|-----|-----|-----|----------|----------|----|
| ATTTTG | 3ISS | BL? | 207 | 702 | 3.47E-03 | 65.71707 | 38 |
| GCATGG | 3ISS | BL? | 136 | 702 | 3.52E-03 | 65.65672 | 38 |
| CTTCCT | 5ISS | ?LM | 290 | 721 | 4.32E-03 | 64.80282 | 38 |
| GACTCA | ESS  | B?M | 26  | 294 | 5.70E-03 | 23.23077 | 9  |
| CATTTT | 5ISS | BL? | 256 | 686 | 6.19E-03 | 63.27059 | 38 |
| TCAGCT | 5ISE | ?LM | 102 | 639 | 6.55E-03 | 63.02    | 38 |
| AAGAAG | ESE  | BLM | 45  | 478 | 6.72E-03 | 22.77778 | 9  |
| CTAAAG | 5ISE | BLM | 131 | 964 | 6.88E-03 | 62.80916 | 38 |
| CTTCTC | 3ISS | BL? | 169 | 702 | 8.49E-03 | 61.89157 | 38 |

**Supplementary Table 3:** List of clustering result for 6 types of SREs (ESE, ESS, upstream ISE, upstream ISS, downstream ISE and downstream ISS). Three columns give cluster ID, cluster annotation, and the SREs in a cluster and their original annotations, respectively.

ESE clusters

|    |     |                                        |
|----|-----|----------------------------------------|
| 1  | ?LM | AGCGAG ?LM<br>GAGCGA ?LM               |
| 2  | ?LM | CAGACT ?LM                             |
| 3  | BLM | AGGAAC BLM                             |
| 4  | BLM | AGCTGC BLM<br>GAGCTG ?LM               |
| 5  | BLM | CAATGA B?M<br>CCAATG ?LM               |
| 6  | B?- | CCCTTA B?-                             |
| 7  | --M | AGAGCG -?M<br>GAGCGG ?-M               |
| 8  | ?LM | CTCGGT ?LM                             |
| 9  | BL- | CAGCAA BL?<br>CGGCCA BL?<br>CCGCAA ?L- |
| 10 | BL? | GGATTT BL?<br>GGATGA BL?               |
| 11 | B-M | CCTGCG B?M<br>GCTGCG ?-M               |
| 12 | ?-M | CACGTG ?-M                             |
| 13 | ?L- | GTGTCT ?L-                             |
| 14 | --M | GGAAGG --M                             |
| 15 | ?L- | TATAGG ?L-                             |
| 16 | -L? | ATGTAC -L?                             |
| 17 | B-- | CTGAAA B--                             |
| 18 | BLM | GTGGCT BLM<br>TGTGGC ?LM               |
| 19 | -LM | ATGGCT -?M<br>GATGGC ?LM               |
| 20 | B?- | TACCTC B?-                             |
| 21 | B-- | CGCTGC B--                             |
| 22 | BL? | ATCTAT BL?                             |
| 23 | BLM | TATGAC BLM<br>ATATGC ?LM               |
| 24 | B-- | GCATTC B--                             |
| 25 | BLM | ACTTCG BL?<br>TTCGAG B?M<br>CTTCGA B?M |

|    |     |                                                                                                              |
|----|-----|--------------------------------------------------------------------------------------------------------------|
| 26 | -L? | AAATCA -L?                                                                                                   |
| 27 | B-- | GGGGAC B-?<br>GGGGCC B--                                                                                     |
| 28 | BLM | TGTTAG BLM<br>GGTCAG BL?                                                                                     |
| 29 | -LM | GCAACA -?M<br>TGCAAC ?LM                                                                                     |
| 30 | B-M | TCTTGC B-?<br>TTTTGG B?M                                                                                     |
| 31 | BLM | CAACCA B?M<br>AACGAG ?LM<br>CAACGA ?LM                                                                       |
| 32 | BLM | TCGACT BL?<br>CGACTG BL?<br>GACTAT BLM<br>CGAGTA ?LM                                                         |
| 33 | BLM | TGGAGC BLM<br>GGAGCA BLM<br>CGGAGA B?M<br>GGAGCG B?M                                                         |
| 34 | BLM | AAGAAG BLM<br>AAGCAG BLM<br>AGAAGC BLM<br>AGCAGC BL?<br>GCAGAA BL?<br>AAGGAG ?LM<br>AGAAGA ?LM<br>AGCAGA ?LM |
| 35 | BLM | GCCAAC BL?<br>GCTAAT B?M                                                                                     |
| 36 | BL- | CTCATA BL?<br>CTCAAT ?L-                                                                                     |
| 37 | --M | CGGGCT -?M<br>GGCGGG --M<br>GGGCTG ?-M                                                                       |
| 38 | BLM | ACGGCA BLM<br>CACGGC BLM<br>CGGCAC BLM                                                                       |

|    |     |                                        |
|----|-----|----------------------------------------|
| 39 | BL- | CCGACG B?-<br>ACCGCC ?L-               |
| 40 | BLM | GTGATA BLM<br>TCGATA ?LM<br>CGATAT ?LM |
| 41 | B-M | GGTACC B?M<br>GATGCC ?-M               |
| 42 | B-M | GGTGA B?M<br>GAGGAG ?-M                |
| 43 | ?L- | GGCGTA ?L-                             |
| 44 | BL- | TGGCA BL?<br>TTGGGA ?L-                |
| 45 | B-- | ATGAGC B--<br>GATGAG B?-               |
| 46 | BLM | TGGTGT BL?<br>CTGGTG BL?<br>AGGGTG B?M |
| 47 | -LM | TCAGGC -L?<br>CAGGCA -?M<br>TCGGGC ?LM |
| 48 | ?L- | ACGTTC ?L-<br>CGCTCC ?L-               |
| 49 | B-- | ACGCGC B--<br>GCGCGC B--<br>CAGCGC B?- |
| 50 | BL- | AACTGC BL?<br>AAACTG ?L-               |
| 51 | B-- | AGCCTG B--<br>ATCCCC B?-               |
| 52 | -LM | TGGAGA -?M<br>GCAGAT ?LM<br>GGAGAT ?LM |

## ESS clusters

|    |     |                                                                                  |
|----|-----|----------------------------------------------------------------------------------|
| 1  | BLM | TTTAAA BLM<br>TTTTAA BL?<br>TTTGAA BL?<br>TTGAAA BL?                             |
| 2  | BLM | AAATAA BLM<br>AATTAT BLM<br>GTATAA BL?<br>AATAAT B?M<br>TAATAA B?M<br>TTATAA ?LM |
| 3  | -LM | ACCTTT -L?<br>ACCTCT ?LM                                                         |
| 4  | BLM | ACTCAC BL?<br>GACTCA B?M                                                         |
| 5  | B?M | CGCTGA B?M                                                                       |
| 6  | B-? | AGAGTG B-?                                                                       |
| 7  | BLM | GGTCT B?M<br>GGTCTT ?LM                                                          |
| 8  | B?M | AACACT B?M                                                                       |
| 9  | BL? | AGATAT BL?                                                                       |
| 10 | ?LM | CAGACC ?LM                                                                       |
| 11 | -?M | AAGCCT -?M                                                                       |
| 12 | ?-M | GGTTG ?-M                                                                        |
| 13 | -L? | ACATCC -L?                                                                       |
| 14 | BLM | ACCGTC BLM                                                                       |
| 15 | --M | CCGCCC -?M<br>CCGCGC -?M<br>CCGCTC ?-M                                           |
| 16 | BL? | TGTAGC BL?                                                                       |
| 17 | BL? | AGGGGA BL?                                                                       |
| 18 | B-M | ATAATA B-M<br>ATAAGA B?M                                                         |
| 19 | --M | AATTCC --M                                                                       |
| 20 | BLM | CCATGT BL?<br>CATTG B?M<br>CCCATT B?M                                            |

|    |     |                                                                    |
|----|-----|--------------------------------------------------------------------|
| 21 | BL- | TTCTTT BL?<br>GTTCTG B?-<br>ATCTTT ?L-                             |
| 22 | B-- | ATGAAT B--                                                         |
| 23 | BLM | TTAAAG BLM<br>CTTAAG B?M<br>GTAAAG ?LM                             |
| 24 | B?M | TATTTA B?M<br>GATTAA B?M                                           |
| 25 | ?LM | CACTCT ?LM<br>CTCTGT ?LM                                           |
| 26 | BLM | GAACTC BL?<br>TAACTT ?LM                                           |
| 27 | BLM | TCTTAG BLM<br>TGCTTA BL?                                           |
| 28 | B-M | AATGTT B-?<br>ATATTG B?M                                           |
| 29 | BLM | GTGTTT BL?<br>TTGTTT B?M                                           |
| 30 | BLM | ACAATA BL?<br>ATACAA ?LM                                           |
| 31 | BLM | TAAGAT BLM<br>TAGGCT BL?                                           |
| 32 | --M | TCCTTG --M<br>CCCTGC -?M                                           |
| 33 | BLM | TGCCTG BLM<br>CTGCCT BLM<br>CCTGCC BLM<br>GCCTGC BLM<br>CCTCCC ?LM |
| 34 | ?L- | CCCCAG ?L-<br>CGGCAG ?L-                                           |

5' ISE (upstream intronic enhancer) clusters

|    |     |                            |                   |
|----|-----|----------------------------|-------------------|
| 1  | BLM | CTGGG                      | BLM               |
| 2  | BLM | GCAGCA                     | BLM               |
| 3  | BL? | TATGCA                     | BL?               |
| 4  | -L? | CCGAAC                     | -L?               |
| 5  | -L? | TTGTAG                     | -L?               |
| 6  | BLM | TAACGT                     | BLM               |
| 7  | ?L- | AAGTTT                     | ?L-               |
| 8  | -?M | AGGCCG                     | -?M               |
| 9  | B-? | TTGGTG                     | B-?               |
| 10 | B?M | AAGTGA                     | B?M               |
| 11 | BLM | TTGTAC                     | BLM               |
| 12 | --M | AGCTGA<br>GCTGAC           | -?M<br>--M        |
| 13 | BL- | CACATA<br>CAAATG           | BL-<br>?L-        |
| 14 | B-- | AACTCA                     | B--               |
| 15 | B-? | TAGTCG                     | B-?               |
| 16 | BL? | GGAGTC                     | BL?               |
| 17 | BL? | CGACAG                     | BL?               |
| 18 | B-- | CATGCA                     | B--               |
| 19 | -LM | CTATAA<br>ATAAAT<br>TATAAA | -L?<br>-?M<br>?LM |
| 20 | -L? | AGGAGA                     | -L?               |
| 21 | B-M | GGTGCC<br>GCTCCC           | B-?<br>B?M        |
| 22 | -LM | GACACA<br>AGACAC<br>TGTAC  | -L?<br>?LM<br>?LM |
| 23 | B-M | CTGGGC<br>CAGGGG           | B-?<br>B?M        |
| 24 | -L? | GATGGT                     | -L?               |
| 25 | --M | TCCCCT                     | --M               |
| 26 | --M | TAATAA<br>TAATAT           | ?-M<br>-?M        |

|    |     |                                      |                          |
|----|-----|--------------------------------------|--------------------------|
| 27 | -L- | ACACTG<br>TACACT                     | -L?<br>-L-               |
| 28 | BLM | ACTTAG<br>CACTTA<br>CACTTG           | B?M<br>B?M<br>?LM        |
| 29 | BLM | AGCTTA<br>TCAGCT                     | B?M<br>?LM               |
| 30 | BLM | TGTGCG<br>GTGTGC<br>TGCGTG<br>GTGCGT | BL?<br>BL?<br>?LM<br>?LM |
| 31 | -LM | ACCGGA<br>CCAGAG                     | -?M<br>?LM               |
| 32 | -LM | ACTTGA<br>CTTGAA                     | -L?<br>?LM               |
| 33 | BLM | CTAAAG<br>CCTAAA                     | BLM<br>BLM               |
| 34 | BL- | AGATAT<br>GAGATT<br>TGAGAT           | BL?<br>BL?<br>B?-        |
| 35 | ?-M | CAGCCA<br>GCAGCC<br>GGCAGC           | ?-M<br>?-M<br>?-M        |
| 36 | B-M | TCCTGA<br>TTCATG<br>TCCTGC           | B-?<br>B?M<br>B?M        |
| 37 | BLM | TGATTG<br>GTGATT<br>TGATTT           | BL?<br>B?M<br>?LM        |
| 38 | B-- | CCTACT                               | B--                      |
| 39 | B-- | ATATGT<br>ATGTGT                     | B--<br>B?-               |
| 40 | -LM | CGCATG<br>GCACGC<br>AGCAAG           | -L?<br>-L?<br>-?M        |

5' ISS (upstream intronic silencer) clusters

|    |     |                                                      |
|----|-----|------------------------------------------------------|
| 1  | -LM | TGTATG -L?<br>GTATAT -?M<br>CTATAT ?LM<br>GTGTAT ?LM |
| 2  | B-M | CATCCG B-M                                           |
| 3  | -?M | AATGTC -?M                                           |
| 4  | B?- | GTTCCG B?-                                           |
| 5  | ?LM | TCTGCA ?LM<br>TCTGCG ?LM                             |
| 6  | B?M | ATATGA B?M                                           |
| 7  | -LM | CTTCTT -L?<br>CTTCCT ?LM                             |
| 8  | BL- | CCCACC BL?<br>CCGACC ?L-<br>CGACCC ?L-               |
| 9  | B?M | CAGGAC B?M                                           |
| 10 | BLM | TTACAA BL?<br>TGAGAA B?M                             |
| 11 | -LM | CCCCCA -L?<br>CTCCCG ?LM                             |
| 12 | B?- | ATCGTT B?-                                           |
| 13 | -L? | TAAGGC -L?                                           |
| 14 | BLM | GCCGAT BLM<br>TGCCGA B?M                             |
| 15 | B-? | ACTATT B-?                                           |
| 16 | -LM | GGATAC -L?<br>GGAAAC ?LM                             |
| 17 | B-? | CTTACA B-?                                           |
| 18 | BLM | CATTTT BL?<br>ATTTAG B?M                             |
| 19 | BL? | GGGAAA BL?                                           |
| 20 | B?- | CATCAC B?-                                           |
| 21 | -L? | GAGAAG -L?                                           |
| 22 | B?- | ACAGGC B?-<br>CAGGCT B?-                             |
| 23 | BLM | AAGATT BLM                                           |
| 24 | BL- | CAGCGG B?-<br>CTGCGG ?L-                             |

|    |     |                                                      |
|----|-----|------------------------------------------------------|
| 25 | B-M | GGGGCC B?M<br>GGGTCT ?-M<br>GGGGCG B?M               |
| 26 | B-- | CAAAAA B--<br>CAAGGA B?-                             |
| 27 | -L- | ATTCAT -L-<br>ATCCCT -L?                             |
| 28 | --M | ATATAC --M<br>ACACAC --M                             |
| 29 | -LM | TATGTG -?M<br>CCTATG ?LM                             |
| 30 | B-M | TCCTCA B?M<br>CATCAA ?-M                             |
| 31 | -LM | CTAATT -?M<br>TCTAAT ?LM                             |
| 32 | B-- | GTATCG B--<br>GGTAGC B?-                             |
| 33 | BLM | CTAGAA BLM<br>CTGCAA BL?<br>CTGGAA BL?               |
| 34 | BLM | TTATCA BL?<br>GTTATC ?LM                             |
| 35 | -LM | TCTCTC -LM<br>CTCTCT -LM<br>TCTCTT ?LM<br>CTCTTT ?LM |
| 36 | BL? | CCCTTC BL?<br>CCCCGC BL?                             |
| 37 | B-M | CAGTCA B-?<br>GTCAGT B-?<br>CAGTCC B?M               |
| 38 | BL- | CTTCT BL?<br>GGCTTT ?L-                              |
| 39 | BLM | TCCAAT BL?<br>CAATAC ?LM                             |
| 40 | B-? | AACCAG B-?<br>AACCGT B-?                             |
| 41 | -LM | GCATGC -L?<br>ATGCAG -?M                             |

3' ISE (downstream intronic enhancer) clusters

|    |     |                                      |                          |
|----|-----|--------------------------------------|--------------------------|
| 1  | BL? | GGATGC                               | BL?                      |
| 2  | BLM | GTAAAA<br>TTAAAA                     | B?M<br>?LM               |
| 3  | B?- | GGAAGT                               | B?-                      |
| 4  | B-? | CTTCCT                               | B-?                      |
| 5  | BL? | CTTGCC                               | BL?                      |
| 6  | BL? | AATCAT                               | BL?                      |
| 7  | BLM | ATTGAT<br>TTGATT<br>TTGCTT           | BL?<br>BL?<br>BLM        |
| 8  | BLM | TGAGGG<br>GAGGGA<br>GGAGGG<br>GGGGGA | BL?<br>BL?<br>BL?<br>B?M |
| 9  | B-- | CCGACC<br>CGACAT                     | B-?<br>B?-               |
| 10 | ?-M | AGGCT                                | ?-M                      |
| 11 | ?L- | CGCGCT                               | ?L-                      |
| 12 | BLM | GAACCG                               | BLM                      |
| 13 | ?LM | CTCTGT                               | ?LM                      |
| 14 | -?M | TTTAGT                               | -?M                      |
| 15 | B?- | CTAGTA                               | B?-                      |
| 16 | B-? | TTGAGG                               | B-?                      |
| 17 | B?- | CAGTTA                               | B?-                      |
| 18 | -L- | ATGATC<br>TGAACA<br>GATCAG           | -L?<br>-L?<br>?L-        |
| 19 | B-M | GAGTTG                               | B-M                      |
| 20 | -L? | GCGGAT                               | -L?                      |
| 21 | --M | TGCATG                               | --M                      |
| 22 | B-M | GCGTGC<br>GCGAAC                     | B?M<br>?-M               |
| 23 | -L- | CGACTG<br>AACTGG                     | -L-<br>?L-               |
| 24 | BLM | GGCAGC<br>GGCAGG<br>GGCGGC           | ?LM<br>B?M<br>B?M        |

|    |     |                                      |                          |
|----|-----|--------------------------------------|--------------------------|
| 25 | BLM | CGCTAA<br>ACGTTA<br>CGTTAT           | B?M<br>?LM<br>?LM        |
| 26 | B-- | GGAATG<br>GGGATG                     | B-?<br>B--               |
| 27 | B-? | CACCCT<br>CACCGT                     | B-?<br>B-?               |
| 28 | BL- | CTGCGT<br>TTGCGA                     | BL?<br>?L-               |
| 29 | BL- | GTCGTC<br>TCATCT                     | BL?<br>?L-               |
| 30 | BLM | TTACTG<br>CATTAC<br>ATTACT           | BLM<br>BL?<br>B?M        |
| 31 | BLM | TTGTAG<br>ATGGAG<br>TGTGGA<br>GTGGAG | B?M<br>BLM<br>?LM<br>?LM |
| 32 | B-- | ACGCCC<br>TGCGCC<br>GCGCCT           | B--<br>B-?<br>B--        |
| 33 | --M | TGTTTT<br>AATGGT                     | -?M<br>?-M               |
| 34 | BL- | AGGGGC<br>CGGTGC                     | B?-<br>?L-               |
| 35 | BLM | CCGAAG<br>CCAAAC                     | BL?<br>B?M               |
| 36 | BL? | GCCTTT                               | BL?                      |
| 37 | --M | GTCTCG                               | --M                      |
| 38 | BL- | ATCTAT<br>TTCTAT<br>TATCTA<br>TCTATC | BL-<br>B?-<br>?L-<br>?L- |
| 39 | ?-M | TGACAT<br>CTGACA                     | ?-M<br>?-M               |
| 40 | -L- | ATTACA<br>GCTTAC                     | -L-<br>-L?               |



3' ISS (downstream intronic silencer) clusters

|    |     |            |            |
|----|-----|------------|------------|
| 1  | BLM | TCTAAA BL? | CTAAAA BLM |
| 2  | BL? | ATTTTG BL? |            |
| 3  | BLM | CTTCTT BL? | CTTCTC BL? |
|    |     | CCTTCT BL? | CCATCT B?M |
| 4  | BLM | CGAGAA BLM | TAGAAC B?M |
|    |     | TAGAAG ?LM |            |
| 5  | --M | TCTATC --M | CTATCT --M |
|    |     | CTAGCC -?M |            |
| 6  | B?- | ACGATG B?- |            |
| 7  | -L- | TGAAGG -L- | TGAACG ?L- |
| 8  | B?M | TCGTTC B?M |            |
| 9  | -L? | GCTCGG -L? |            |
| 10 | ?-M | TATATT ?-M | TTTAT ?-M  |
| 11 | BLM | GAATAT BL? | GCATAA B?M |
| 12 | B-M | AAGCCA B?M | AGCCAT B?M |
|    |     | GCCATG ?-M |            |
| 13 | BL? | AAACTT BL? |            |
| 14 | -LM | CCCCGC -LM |            |
| 15 | -L? | TGGGGA -L? |            |
| 16 | ?L- | TACCTC ?L- |            |
| 17 | BL? | ACTCGG BL? |            |
| 18 | BLM | CTGGAG BLM |            |
| 19 | B-? | GAAGAG B-? | GGAAGA B-? |
| 20 | -?M | ATCATC -?M | AGCATT -?M |
| 21 | BL- | TCCTTA B?- | TTCATT ?L- |
| 22 | --M | GAGGCT --M |            |
| 23 | BLM | TACGTA BLM |            |

|    |     |            |            |
|----|-----|------------|------------|
| 24 | B?- | GGATCC B?- |            |
| 25 | BLM | CACATG BL? | GCATGG BL? |
|    |     | CATGGG ?LM |            |
| 26 | B-M | CTACCC B?M | TTCCCC ?-M |
| 27 | BLM | CTTCAA B?M | ACTCAA ?LM |
| 28 | BL- | AAGTTT BL? | AGTTTC BL? |
|    |     | GTTTGG BL? | GTTTCT B?- |
| 29 | BLM | TTCTTC BLM | TCATCA BLM |
| 30 | BLM | AAAAGC B?M | TAAAAG B?M |
|    |     | ATAAGT ?LM |            |
| 31 | --M | ACTATT --M | ACTCTA ?-M |
| 32 | ?L- | TATGGC ?L- | GCTATG ?L- |
| 33 | -L- | TGCATG -L- | GCATGT -L- |
|    |     | GTGCAT ?L- |            |
| 34 | -L- | CGCCCC -L- | GCCCCG -L? |
|    |     | CCCCGA ?L- |            |
| 35 | B-M | AGATAA B?M | AGCTAG ?-M |
|    |     | AGGTAG ?-M |            |
| 36 | ?L- | CTCTTC ?L- |            |
| 37 | ?LM | GGCCCT ?LM |            |
| 38 | -LM | ACGGCT -L? | TCGGGT ?LM |
|    |     | CCGGAT ?LM |            |
| 39 | B-? | CACACA B-? | GCACAG B-? |
| 40 | --M | GCGCGC --M | CYCGCC -?M |
